# Supplementary material for: Non-invasive cardiac output measurement by electrical cardiometry and M-mode echocardiography in the neonate: a prospective observational study of 136 neonatal infants
Source: PubMed Central journal article supplement — Transl Pediatr. 2021 Jul;10(7):1757–64. doi: 10.21037/tp-21-20 (PMC8349957; doi:10.21037/tp-21-20), 2021-07
Supplement: tp-10-07-1757-dss.pdf [file tp-10-07-1757-dss.pdf]

## Data Sharing Statement

|                     |                                                                                                                                                     |                                                                                                                                               |
|---------------------|-----------------------------------------------------------------------------------------------------------------------------------------------------|-----------------------------------------------------------------------------------------------------------------------------------------------|
| <b>Article Info</b> | https://dx.doi.org/10.21037/tp-21-20                                                                                                                |                                                                                                                                               |
| <b>Item</b>         | <b>Question</b>                                                                                                                                     | <b>Authors' Response<br/>(place "-" if not applicable)</b>                                                                                    |
| 1                   | Would you like to share data collected for your study to others?                                                                                    | Yes                                                                                                                                           |
| 2                   | If not, would you like to share the reason for your decision?                                                                                       | -                                                                                                                                             |
| 3                   | What data in particular will be shared?                                                                                                             | We will decide whether to provide the corresponding data according to the reader's specific request.                                          |
| 4                   | Any other documents will be shared? Such as study protocol, statistical analysis plan, informed consent form, clinical study report, analytic code. | Statistical analysis plan, informed consent form, and clinical study report will also be shared if requested.                                 |
| 5                   | When will data availability begin?                                                                                                                  | From the publication date.                                                                                                                    |
| 6                   | When will data availability end?                                                                                                                    | Two years within the publication date, since the technique may be updated over time.                                                          |
| 7                   | To whom will you share the data?                                                                                                                    | Pediatricians                                                                                                                                 |
| 8                   | For what type of analysis or purpose?                                                                                                               | To investigate the correlation and consistency of CO values in newborns obtained by using EC and M-mode echocardiography (Teichholtz formula) |
| 9                   | How or where can the data/documents be obtained?                                                                                                    | Emails could be sent to the address below to obtain the shared data:<br>gqcheng_cm@fudan.edu.cn                                               |
| 10                  | Any other restrictions?                                                                                                                             | We may balance the potential benefits and risks for each request and then provide the data that could be shared.                              |
